# Supplementary material
Source: MDPI journal article supplement (https://www.mdpi.com/2227-9040/10/12/531)
Supplement: s1 [file s1]

## **Supplementary Information**

# **Target and suspect analysis with High-Resolution Mass Spectrometry for the exhaustive monitoring of PCBs and pesticides in *Posidonia oceanica* meadows and sediments**

Marina Astudillo-Pascual<sup>1</sup>, Pedro A. Aguilera<sup>1</sup>, Antonia Garrido Frenich<sup>2</sup>  
and Irene Domínguez<sup>2,\*</sup>

<sup>1</sup>*Department of Biology and Geology, International Campus of Excellence in Marine Science (CEIMAR), University of Almeria, E-04120 Almeria, Spain*

<sup>2</sup>*Department of Chemistry and Physics, Research Centre for Mediterranean Intensive Agrosystems and Agri-Food Biotechnology (CIAIMBITAL), Agrifood Campus of International Excellence, ceiA3, University of Almería, E-04120 Almeria, Spain*

\*Correspondence: [idominguez@ual.es](mailto:idominguez@ual.es)

## Table of contents

| Content                                                                                                                                                                                                                                                                                                                                    | Page |
|--------------------------------------------------------------------------------------------------------------------------------------------------------------------------------------------------------------------------------------------------------------------------------------------------------------------------------------------|------|
| <b>Table S1.</b> Target PCBs, pesticides and the IIS included in this study with their corresponding CAS number and n-octanol/water partition coefficient ( $\log K_{ow}$ ).                                                                                                                                                               | 3    |
| <b>Figure S1.</b> Maps with the three regions belonging to the Mediterranean Spanish coast surveyed in this study: (A) Almeria region, (B) Murcia and (C) Alicante. Figure made by author using Ocean Data View (Schlitzer, R., Ocean Data View, <a href="https://odv.awi.de">https://odv.awi.de</a> , 2021).                              | 4    |
| <b>Table S2.</b> Sampling areas description, from west to east orientation. Non-vegetated sediment (◻, n = 23), leaves (◇, n = 21), rhizome (■, n = 20), vegetated sediment (▣, n = 20).                                                                                                                                                   | 5-6  |
| Analysis of organic contaminants: GC-Q-Orbitrap MS parameters.                                                                                                                                                                                                                                                                             | 7    |
| <b>Table S3.</b> Oven program.                                                                                                                                                                                                                                                                                                             | 7    |
| <b>Table S4.</b> Retention time and m/z ions selected for the quantification and confirmation of the PCB and pesticide compounds in the present study and the IS.                                                                                                                                                                          | 8    |
| Extraction procedures                                                                                                                                                                                                                                                                                                                      | 8-9  |
| <b>Table S5.</b> Minimum and maximum recoveries (%) per class of POP, regarding the extraction procedures in <i>P. oceanica</i> leaves and rhizomes.                                                                                                                                                                                       | 9    |
| <b>Table S6.</b> Minimum and maximum recoveries (%) per class of POP, regarding the extraction solvent employed in surficial sediments.                                                                                                                                                                                                    | 9    |
| <b>Figure S2.</b> Location of ALI5, ALI6 and ALI7 sampling areas from Alicante and their corresponding ΣPCBs and ΣPriority pesticides values ( $\mu\text{g kg}^{-1}$ ) in rhizomes (RHIZ) and vegetated sediment (V-SED). Images retrieved from Google (©Images 2022 CNES, NOAA, U.S. Navy. NGA, GEBCO, TerraMetrics, Landsat, Copernicus) | 10   |
| <b>Figure S3.</b> Extracted ion chromatogram and mass spectrum of PCB 153, 138, 128, 167, and 157 isomers detected in the vegetated sediment at ALI6                                                                                                                                                                                       | 11   |
| <b>Figure S4.</b> Extracted ion chromatograms of trifluralin, chlorpyrifos and isodrin detected in the rhizomes at ALI5.                                                                                                                                                                                                                   | 11   |
| <b>Table S7.</b> Current-use pesticides identified in this study and their corresponding RT, molecular weight, $\log K_{ow}$ , and their quantification and confirmation ions.                                                                                                                                                             | 12   |
| <b>Figure S5.</b> ΣCurrent-use pesticides of concern ( $\mu\text{g kg}^{-1}$ ) seen in the different studied matrices of the aquatic plant <i>P. oceanica</i> , vegetated sediments (V-sed) and non-vegetated (NV-sed) among different sampling stations.                                                                                  | 12   |
| <b>Table S8.</b> Summary of the known POPs extraction methods in <i>P. oceanica</i> . PLE: Pressurized Liquid Extraction.                                                                                                                                                                                                                  | 12   |
| <b>Table S9.</b> PCBs concentration in rhizomes ( $\mu\text{g kg}^{-1}$ w.w.) compared to BAC and EAC for fish ( <i>M. barbatus</i> ) and mussels ( <i>M. galloprovincialis</i> ) used by OSPAR and Marine Strategy Framework Directive (MSFD). Wet weight values were obtained by considering the moisture content (%) of each sample.    | 13   |
| <b>Table S10.</b> PCBs ( $\mu\text{g kg}^{-1}$ d.w.) concentrations detected in the Mediterranean Sea <sup>a,b,c,d</sup> . Only the sampling areas where contamination was detected have been included in the table.                                                                                                                       | 14   |
| <b>Table S11.</b> Priority pesticide concentrations ( $\mu\text{g kg}^{-1}$ d.w.) detected in biota and sediments from other studies.                                                                                                                                                                                                      | 15   |
| <b>References</b>                                                                                                                                                                                                                                                                                                                          | 16   |

### ***Chemical reagents: Standards***

The analytical standards here employed showed a purity above 97%. A multiclass standard mixture containing the target POPs (PCBs and priority pesticides) was prepared in acetone at a concentration of 100  $\mu\text{g l}^{-1}$ . The additional 246 current-use pesticides were collected into two mix-standards solutions prepared in acetone of 5  $\text{mg l}^{-1}$ . In the case of the IIS, hexachlorobenzene-13C and PCB 28F, a 500  $\mu\text{g l}^{-1}$  solution in acetone was prepared. For correct preservation, all standard working solutions were kept in amber screw-capped glass vials and stored at -20 °C when not in use.

**Table S1.** Target PCBs, pesticides and the IIS included in this study with their corresponding CAS number and n-octanol/water partition coefficient ( $\log K_{ow}$ ).

| Compound      | CAS number  | $\log K_{ow}$ | Compound                    | CAS number | $\log K_{ow}$ |
|---------------|-------------|---------------|-----------------------------|------------|---------------|
| PCB 18        | 37680-65-2  | 5.60          | PCB 169                     | 32774-16-6 | 7.41          |
| PCB 28+31     | 7012-37-5   | 5.62          | PCB 170                     | 35065-30-6 | 7.27          |
| PCB 28F (IIS) | 863314-89-0 | 5.80          | PCB 180                     | 35065-29-3 | 7.72          |
| PCB 44        | 41464-39-5  | 5.81          | PCB 189                     | 39635-31-9 | 7.71          |
| PCB 52        | 35693-99-3  | 6.09          | PCB 194                     | 35694-08-7 | 8.68          |
| PCB 66        | 32598-10-0  | 5.90          | PCB 206                     | 40186-72-9 | 8.09          |
| PCB 77        | 32598-13-3  | 6.72          | Aldrin                      | 309-00-2   | 6.50          |
| PCB 81        | 70362-50-4  | 6.36          | Atrazine                    | 1912-24-9  | 2.61          |
| PCB 101       | 37680-73-2  | 5.68          | Chlorpyrifos                | 2921-88-2  | 4.96          |
| PCB 105       | 32598-14-4  | 6.79          | Dieldrin                    | 60-57-1    | 5.40          |
| PCB 114       | 74472-37-0  | 6.65          | Endrin                      | 72-20-8    | 5.20          |
| PCB 118       | 31508-00-6  | 7.12          | Hexachlorobenzene           | 118-74-1   | 5.73          |
| PCB 123       | 65510-44-3  | 6.74          | Hexachlorobenzene 13C (IIS) | 93952-14-8 | 5.70          |
| PCB 126       | 57465-28-8  | 6.89          | Isodrin                     | 465-73-6   | 6.75          |
| PCB 128       | 11096-82-5  | 7.31          | o,p'-DDT                    | 789-02-6   | 6.70          |
| PCB 138       | 35065-28-2  | 7.44          | p,p'-DDD                    | 72-54-8    | 6.02          |
| PCB 153       | 35065-27-1  | 6.34          | p,p'-DDT                    | 50-29-3    | 6.91          |
| PCB 156       | 38380-08-4  | 7.60          | Pentachlorobenzene          | 608-93-5   | 5.18          |
| PCB 157       | 69782-90-7  | 7.60          | Simazine                    | 122-34-9   | 2.18          |
| PCB 167       | 52663-72-6  | 7.50          | Trifluralin                 | 1582-09-8  | 5.34          |

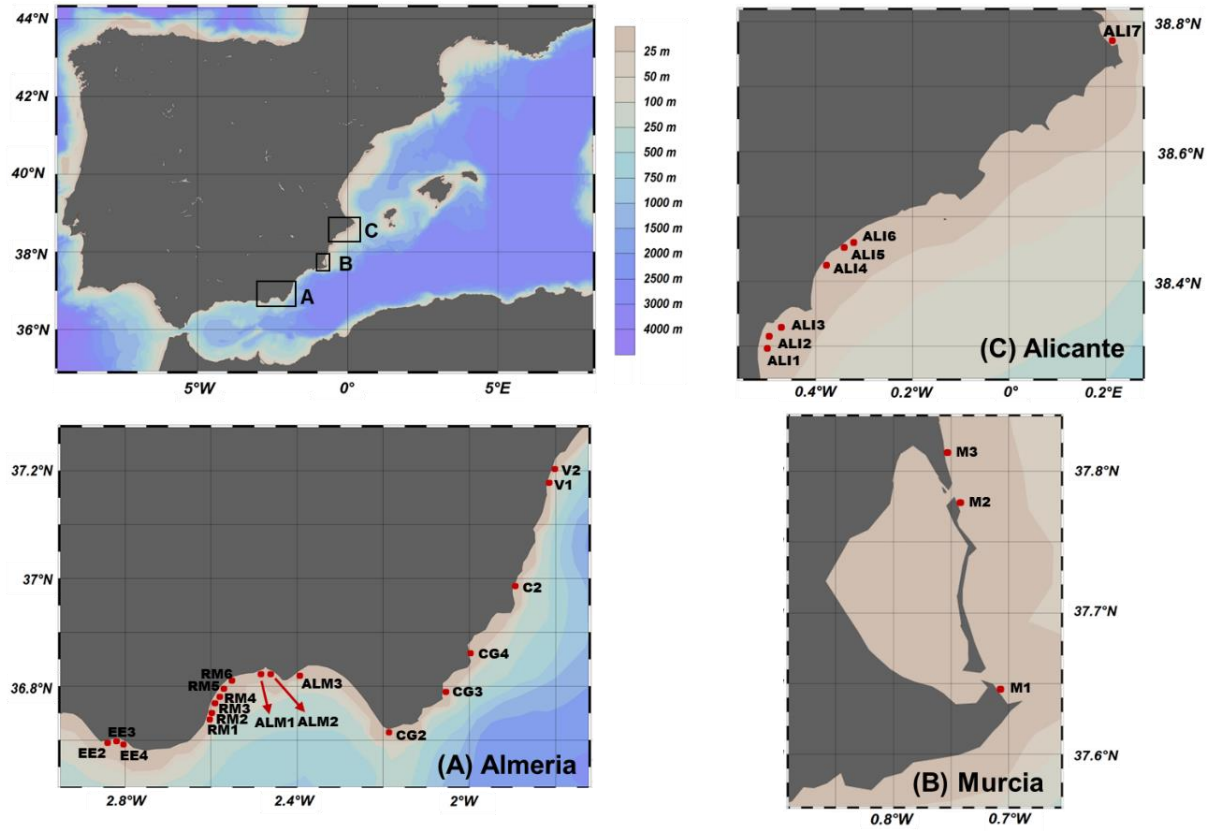

**Figure S1.** Maps with the three regions belonging to the Mediterranean Spanish coast surveyed in this study: (A) Almeria region, (B) Murcia and (C) Alicante. Figure made by the authors using Ocean Data View (Schlitzer, R., Ocean Data View, <https://odv.awi.de>, 2021).

## Study area and sampling

**Table S2.** Sampling areas description, from west to east orientation. Non-vegetated sediment (▨, n = 23), leaves (◇, n = 21), rhizome (■, n = 20), vegetated sediment (▩, n = 20).

| Region  | Sampling stations            | Location (WGS84)     | ID    | Analyzed samples | Area description                                                                                                                             | Depth(m) |      |      |          | Distance from coast (m) | Sampling date |
|---------|------------------------------|----------------------|-------|------------------|----------------------------------------------------------------------------------------------------------------------------------------------|----------|------|------|----------|-------------------------|---------------|
|         |                              |                      |       |                  |                                                                                                                                              | ◇        | ■    | ▩    | ▨        |                         |               |
| Almeria | Guardias Viejas water course | 36.695692, -2.842181 | EE2   | ◇ ■ ▩ ▨          | In front of a watercourse exit and influenced by greenhouses                                                                                 | 4.2      | 4.2  | 3.7  | 4.2      | 180                     | Oct 2019      |
|         | Almerimar marina             | 36.698113, -2.789602 | EE3   | ▨                | Recreational marina with intense seasonal tourism                                                                                            | -        | -    | -    | 2.9; 3.1 | -                       | Oct 2020      |
|         | Almerimar Punta Entinas      | 36.682722, -2.781789 | EE4   | ◇ ■ ▩ ▨          | Punta Entinas-Sabinar Natural Area, reserve, and Site of Community Importance (SCI). Closeness to intensive agriculture areas (greenhouses)  | 10.3     | 10.3 | 10.2 | 10.3     | 670                     | Oct 2019      |
|         | Roquetas de Mar Port         | 36.759793, -2.605386 | RM1   | ◇ ■ ▩ ▨          | Small recreational marina and fishing port                                                                                                   | 2.8      | 2.8  | 3    | 2.8      | 62                      | Nov 2019      |
|         | Roquetas de Mar              | 36.765929, -2.601214 | RM2   | ▩                | Hotel complex area and exit to a sewage pipe                                                                                                 | -        | 3.4  | -    | 2.9      | 230                     | Oct 2019      |
|         | Cura Ravine (W)              | 36.769575, -2.600480 | RM3   | ◇ ■ ▩ ▨          | Exit to a watercourse and draining system from an artificial wetland surrounded by greenhouses (Balsa del Sapo, “Toad Pond”)                 | 4.3      | 4.3  | 6.6  | 4.3      | 164                     | Oct 2019      |
|         | Cura Ravine (E)              | 36.772200, -2.600321 | RM4   | ◇ ■ ▩ ▨          |                                                                                                                                              | 4.6      | 4.6  | 5.3  | 4.6      | 22                      | Nov 2019      |
|         | Algaida                      | 36.783936, -2.591814 | RM5   | ◇ ■ ▩ ▨          | SCI, subject to occasional illegal direct spills                                                                                             | 1        | 1    | 1.5  | 1        | 53                      | Oct 2019      |
|         | Aguadulce Harbor             | 36.815391, -2.561088 | RM6   | ▨                | Recreational marina with elevated seasonal touristic activity                                                                                | -        | -    | -    | 7.0; 6.2 | -                       | Mar 2021      |
|         | San Telmo                    | 36.830635, -2.487396 | ALM1  | ◇ ■ ▩ ▨          | Outer Almeria Harbor (commercial, fishing, and recreational harbor). Near an outflow of municipal wastewater                                 | 7.5      | 7.5  | 8.5  | 7.5      | 57                      | Oct 2019      |
|         | Almeria Promenade            | 36.824700, -2.452053 | ALM2  | ◇ ■ ▩ ▨          | Closeness to the urban center of the city. Intense touristic activity                                                                        | 7.8      | 7.8  | 8.4  | 7.8      | 80                      | Dec 2019      |
|         | Costacabana                  | 36.828550, -2.385822 | ALM3* | ◇ ■ ▩            | Exit to a watercourse passing along greenhouses and irrigating extensive crops. Proximity to a sewage pipe. Running airport in the proximity | 7.8      | 7.8  | -    | 7.8; 8.1 | 540                     | Nov 2019      |
|         | Gata Cape beach              | 36.723349, -2.194234 | CG2   | ◇ ■ ▩ ▨          | Gata Cape MPA and Natural Park and a watercourse exit and human wastewater effluents                                                         | 4.5      | 4.5  | 5    | 4.5      | 63                      | Jan 2020      |
|         | Los Escullos                 | 36.796096, -2.061859 | CG3   | ◇ ■ ▩ ▨          | Area with irrigated extensive crops, several watercourses exit. Inside Gata Cape MPA and Natural Park                                        | 1        | 1    | 1.5  | 1        | 29                      | Jan 2020      |

|          |                              |                         |       |  |                                                                                                                                                                                                            |      |      |             |             |      |            |
|----------|------------------------------|-------------------------|-------|--|------------------------------------------------------------------------------------------------------------------------------------------------------------------------------------------------------------|------|------|-------------|-------------|------|------------|
| Murcia   | El Playazo                   | 36.862794,<br>-2.003661 | CG4   |  | Area with non-irrigated and irrigated extensive crops, small and fractionated settlements. Affected by several watercourses exit. Inside Gata Cape MPA and Natural Park                                    | 0.5  | 0.5  | 2           | 0.5         | 5    | Jan 2020   |
|          | Isla de San Andrés           | 36.995175,<br>-1.889448 | C2    |  | Special Area of Conservation (SAC)                                                                                                                                                                         | 1    | 1    | 1.4         | 1           | 70   | Feb 2020   |
|          | Villaricos 1                 | 37.243813,<br>-1.772810 | V1    |  | Seasonal Almanzora river watercourse with agricultural influence, and closeness to a pharmaceutical industry                                                                                               | -    | -    | -           | 2.2;<br>2.3 | 140  | Feb 2020   |
|          | Deretil                      | 37.255522,<br>-1.758341 | V2    |  | Pharmaceutical industry influence, receiving plume of treated waters, Almanzora river watercourses with agriculture influence and proximity to urban area.                                                 | 12.4 | -    | -           | -           | 215  | Julio 2021 |
|          | Mar Menor North Chanel       | 37.653726,<br>-0.716768 | M1    |  | Exists to the open sea of a semi-enclosed and highly touristic lagoon, impacted by agricultural activity.                                                                                                  |      | -    | -           | 2;2.5       | 72   | Mar 2020   |
|          | Mar Menor Harbor Chanel      | 37.778983,<br>-0.74429  | M2    |  |                                                                                                                                                                                                            | -    | -    | -           | 1.1;<br>1.5 | 61   | Mar 2020   |
|          | Mar Menor Encañizadas Chanel | 37.823707,<br>-0.756447 | M3    |  |                                                                                                                                                                                                            |      | -    | -           | 2.5;<br>2.9 | 90   | Mar 2020   |
|          | Urba 1                       | 38.291326,<br>-0.494084 | ALI1  |  | Closeness to former functioning salt pans, moderately urbanized, agriculture activity and maritime traffic of small to medium watercraft.                                                                  | 16   | 16   | 16          | 16          | 2270 | Feb 2020   |
|          | Desal                        | 38.302493,<br>-0.488727 | ALI2* |  | Area influenced by brine discharge from a desalination plant, waste-water treatment plant, watercourse exist and Alicante Harbor                                                                           | 16   | 16   | 16;<br>16.3 | -           | 2510 | Feb 2020   |
|          | Alicante Harbor              | 38.326396,<br>-0.477619 | ALI3* |  | Outer Alicante Harbor (commercial, fishing, and recreational activities) and waste-water treatment plant effluent and watercourse                                                                          | 16.6 | 16.6 | 16.6        | -           | 1200 | Feb 2020   |
| Alicante | Campello                     | 38.414186,<br>-0.391352 | ALI4  |  | Closeness to a desalination plant, brine outflow and sewage plant. Exist of a seasonal watercourse influenced by agriculture. Breakwaters, traffic pleasure boats and closeness to fish farm               | 1.8  | 1.8  | 3.4         | 1.8         | 120  | Mar 2020   |
|          | Cala Nostra                  | 38.443518,<br>-0.370742 | ALI5  |  | Area with septic tanks, closeness to a watercourse exits influenced by agriculture                                                                                                                         | 1.7  | 1.7  | 2.8         | 1.7         | 30   | Mar 2020   |
|          | Cala Morro Blanc             | 38.445734,<br>-0.364306 | ALI6  |  | Artificial beach, with breakwaters and subjected to frequent dragging activities. Exceptional inputs of urban stormwater runoff. Closeness to a small fish farm and watercourse influenced by agriculture. | 4.1  | 4.1  | 5           | 4.1         | 19   | Mar 2020   |
|          | Cala Sardinera               | 38.762431,<br>0.219156  | ALI7  |  | Intense seasonal tourism and boats                                                                                                                                                                         | 3    | 3    | 3           | 4.5         | 140  | Mar 2020   |

\* Stations where non-vegetated sediment was not sampled due to the impossibility to reach the meadow's limit.

### *Analysis of organic contaminants: GC-Q-Orbitrap MS parameters*

**Table S3.** Oven program

| Time span<br>(min) | Temperature<br>(°C) | Increase rate<br>(°C min <sup>-1</sup> ) |
|--------------------|---------------------|------------------------------------------|
| 1                  | 50                  |                                          |
| 6                  | 170                 | 20                                       |
| 14                 | 310                 | 10                                       |
| 8                  | 310                 |                                          |

The filament on delay was set for 5 min, with a runtime of 5 to 29 min. The temperature chosen for the ion source and the MS transfer line was 250 °C. The employed FS MS acquisition mode in positive polarity had a scan range of  $m/z$  40 to 500 and 1  $\mu$ scan maximum injection time, a resolution power of 60.000 full widths at half maximum (FWHM) and 1e6 ions AGC (automatic gain control) target. The software Xcalibur version 4.1 (in Qual browser mode) and TraceFinder 4.1 (Thermo Fisher Scientific, Les Ulis, France) were used to process the chromatograms.

Peak detection and integration were automated using the software TraceFinder 4.1.

For this purpose, the following parameters were established:

- Detection Algorithm: ICIS
- Detection method: Highest peak
- Area noise factor: 5
- Peak noise factor/tolerance: 5
- Baseline window: 40
- Minimum peak height (S/N): 3.00
- Noise method: repetitive
- Min peak width: 3
- Area tail extension: 5
- Area scan window: 0
- Mass/time interval: 30 s
- Peak threshold: 10%

When necessary, the analysts performed an adjustment or a manual integration of the peaks through the software Xcalibur 4.1.

Bear in mind that when an Orbitrap analyzer in full scan mode is used, the subsequent Total Ion Chromatogram (TIC or “Raw Chromatographic”) offers abundant information from multiple residues, possibly overlapping information. Hence, to correctly observe the studied microcontaminants, extracted ion chromatograms of each compound must be used.

**Table S4.** Retention time and  $m/z$  ions selected for the quantification and confirmation of the PCB and pesticide compounds in the present study and the IIS.

| Mean RT (min) | Compound Name                  | Molecular Formula                                                            | Quantification ion 1 ( $m/z$ ) | Ion 2 ( $m/z$ ) | Ion 3 ( $m/z$ ) |
|---------------|--------------------------------|------------------------------------------------------------------------------|--------------------------------|-----------------|-----------------|
| 9.21 ± 0.03   | Pentachlorobenzene             | C <sub>6</sub> HCl <sub>5</sub>                                              | 249.84850                      | 107.97609       | 214.87968       |
| 10.20 ± 0.04  | Trifluralin                    | C <sub>11</sub> H <sub>11</sub> F <sub>3</sub> N <sub>3</sub> O <sub>4</sub> | 264.02258                      | 306.06960       | 248.02769       |
| 10.88 ± 0.02  | PCB 18                         | C <sub>12</sub> H <sub>7</sub> Cl                                            | 283.80954                      | 201.07741       | 186.05460       |
| 10.88 ± 0.01  | Hexachlorobenzene              | C <sub>6</sub> Cl <sub>6</sub>                                               | 283.80956                      | 248.84075       | 141.93712       |
| 10.89 ± 0.03  | Hexachlorobenzene<br>13C (IIS) | <sup>13</sup> C <sub>6</sub> Cl <sub>6</sub>                                 | 289.82962                      | 248.84073       | 186.05405       |
| 10.89 ± 0.03  | Simazine                       | C <sub>7</sub> H <sub>12</sub> ClN <sub>5</sub>                              | 201.07745                      | 186.05402       | 173.04620       |
| 10.95 ± 0.03  | Atrazine                       | C <sub>7</sub> H <sub>11</sub> ClN <sub>5</sub>                              | 200.06961                      | 215.09315       | 202.06668       |
| 11.33 ± 0.03  | PCB 28F (IIS)                  | C <sub>12</sub> H <sub>6</sub> Cl <sub>3</sub> F                             | 274.95983                      | 276.95625       | 285.25761       |
| 12.28 ± 0.01  | PCB 28+31                      | C <sub>12</sub> H <sub>7</sub> Cl <sub>3</sub>                               | 255.96070                      | 186.02292       | 150.04635       |
| 12.88 ± 0.04  | PCB 52                         | C <sub>12</sub> H <sub>6</sub> Cl <sub>4</sub>                               | 219.98397                      | 291.91890       | 254.95288       |
| 13.08 ± 0.04  | Chlorpyrifos                   | C <sub>5</sub> H <sub>2</sub> Cl <sub>3</sub> NO                             | 196.92020                      | 114.96132       | 170.92166       |
| 13.24 ± 0.04  | PCB 44                         | C <sub>12</sub> H <sub>6</sub> Cl <sub>4</sub>                               | 219.98397                      | 291.91890       | 254.95288       |
| 13.26 ± 0.05  | Aldrin                         | C <sub>7</sub> H <sub>2</sub> Cl <sub>5</sub>                                | 262.85635                      | 292.92680       | 152.06200       |
| 13.79 ± 0.05  | Isodrin                        | C <sub>7</sub> H <sub>2</sub> Cl <sub>5</sub>                                | 192.93721                      | 266.93759       | 146.97622       |
| 14.05 ± 0.04  | PCB 66                         | C <sub>12</sub> H <sub>6</sub> Cl <sub>4</sub>                               | 219.98397                      | 291.91890       | 254.95288       |
| 14.45 ± 0.04  | PCB 101                        | C <sub>12</sub> H <sub>5</sub> Cl <sub>5</sub>                               | 325.87967                      | 253.94508       | 184.00729       |
| 14.97 ± 0.01  | PCB 81                         | C <sub>12</sub> H <sub>6</sub> Cl <sub>4</sub>                               | 291.91874                      | 219.98400       | 150.04642       |
| 15.11 ± 0.05  | Dieldrin                       | C <sub>7</sub> H <sub>2</sub> Cl <sub>5</sub>                                | 262.85637                      | 264.85350       | 236.84068       |
| 15.16 ± 0.01  | PCB 77                         | C <sub>12</sub> H <sub>6</sub> Cl <sub>4</sub>                               | 291.91874                      | 219.98400       | 150.04642       |
| 15.54 ± 0.04  | PCB 123                        | C <sub>12</sub> H <sub>5</sub> Cl <sub>5</sub>                               | 325.87967                      | 253.94508       | 184.00729       |
| 15.60 ± 0.04  | PCB 118                        | C <sub>12</sub> H <sub>5</sub> Cl <sub>5</sub>                               | 325.87967                      | 253.94508       | 184.00729       |
| 15.69 ± 0.05  | Endrin                         | C <sub>7</sub> H <sub>2</sub> Cl <sub>5</sub>                                | 262.85638                      | 264.85352       | 242.95303       |
| 15.70 ± 0.04  | o,p'-DDT                       | C <sub>13</sub> H <sub>9</sub> Cl                                            | 235.00744                      | 165.06981       | 199.03076       |
| 15.76 ± 0.06  | p,p'-DDD                       | C <sub>13</sub> H <sub>9</sub> Cl                                            | 235.00760                      | 165.06985       | 176.06192       |
| 15.80 ± 0.04  | PCB 114                        | C <sub>12</sub> H <sub>5</sub> Cl <sub>5</sub>                               | 325.87967                      | 253.94508       | 184.00729       |
| 15.98 ± 0.04  | PCB 153                        | C <sub>12</sub> H <sub>4</sub> Cl <sub>6</sub>                               | 359.84067                      | 289.90308       | 144.95128       |
| 16.06 ± 0.04  | PCB 105                        | C <sub>12</sub> H <sub>5</sub> Cl <sub>5</sub>                               | 325.87967                      | 253.94508       | 184.00729       |
| 16.39 ± 0.05  | p,p'-DDT                       | C <sub>13</sub> H <sub>9</sub> Cl <sub>2</sub>                               | 235.00754                      | 165.06984       | 176.06199       |
| 16.47 ± 0.04  | PCB 138                        | C <sub>12</sub> H <sub>4</sub> Cl <sub>6</sub>                               | 359.84067                      | 289.90308       | 144.95128       |
| 16.68 ± 0.03  | PCB 126                        | C <sub>12</sub> H <sub>5</sub> Cl <sub>5</sub>                               | 325.87967                      | 253.94508       | 184.00729       |
| 16.95 ± 0.04  | PCB 128                        | C <sub>12</sub> H <sub>4</sub> Cl <sub>6</sub>                               | 359.84067                      | 289.90308       | 144.95128       |
| 17.00 ± 0.04  | PCB 167                        | C <sub>12</sub> H <sub>4</sub> Cl <sub>6</sub>                               | 359.84067                      | 289.90308       | 144.95128       |
| 17.40 ± 0.04  | PCB 156                        | C <sub>12</sub> H <sub>4</sub> Cl <sub>6</sub>                               | 359.84067                      | 289.90308       | 144.95128       |
| 17.48 ± 0.04  | PCB 157                        | C <sub>12</sub> H <sub>4</sub> Cl <sub>6</sub>                               | 359.84067                      | 289.90308       | 144.95128       |
| 17.68 ± 0.04  | PCB 180                        | C <sub>12</sub> H <sub>3</sub> Cl <sub>7</sub>                               | 323.86399                      | 393.80166       | 161.93174       |
| 18.09 ± 0.03  | PCB 169                        | C <sub>12</sub> H <sub>4</sub> Cl <sub>6</sub>                               | 359.84067                      | 289.90308       | 144.95128       |
| 18.18 ± 0.04  | PCB 170                        | C <sub>12</sub> H <sub>3</sub> Cl <sub>7</sub>                               | 323.86399                      | 393.80166       | 161.93174       |
| 18.71 ± 0.04  | PCB 189                        | C <sub>12</sub> H <sub>3</sub> Cl <sub>7</sub>                               | 323.86399                      | 393.80166       | 161.93174       |
| 19.30 ± 0.04  | PCB 194                        | C <sub>12</sub> H <sub>2</sub> Cl <sub>8</sub>                               | 429.75952                      | 357.82515       | 178.91229       |
| 19.94 ± 0.04  | PCB 206                        | C <sub>12</sub> HCl <sub>9</sub>                                             | 196.89132                      | 463.72044       | 391.78607       |

### *Extraction procedures*

Agitation extraction consisted of the addition of 3 ml hexane/ethyl acetate 9:1 v/v solvent to 150 mg d.w. sample in a 15 ml Falcon tube, which was agitated for 10 min through a rotary shaker Reax 2 (Heidolph, Schwabach, Germany). For the UAE the same amount of solvent and sample were used, followed by a sonicating bath (Ultrasonic Elmasonic S 80 H, Elma Schmidbauer GmbH, Singen, Germany) for 4



min at room temperature (~25 °C). In the case of the QuEChERS, 150 mg d.w. sample were weighed in a 50 ml Falcon tube, afterward 10 ml milli-Q water and 10 ml hexane/ethyl acetate (9:1) were added. Finally, the extraction salts were incorporated (1.2 g MgSO<sub>4</sub> and 0.3 g NaCl) and vortexed for 1 minute. The QuEChERS-UAE extraction was performed similarly to QuEChERS but replacing the vortex step with 1 min sonication. In all cases, a centrifugation was carried out (5000 rpm, 10 min), then the organic layers were subtracted, filtered (0.22 µm nylon filter) and transferred into 2 ml vials.

**Table S5.** Minimum and maximum recoveries (%) per class of POP, regarding the extraction procedures in *P. oceanica* leaves and rhizomes.

| Matrix   | Compounds  | Polytron<br>(2 min) | Agitation<br>(10 min) | UAE<br>(4 min) | QuEChERS | QuEChERS-<br>UAE |
|----------|------------|---------------------|-----------------------|----------------|----------|------------------|
| Leaves   | Pesticides | 109-119             | 46-152                | 73-140         | 12-157   | 11-67            |
|          | PCBs       | 106-117             | 60-80                 | 29-108         | 12-22    | 3-15             |
| Rhizomes | Pesticides | 110-117             | 61-189                | 77-126         | 14-83    | 50-140           |
|          | PCBs       | 107-120             | 61-80                 | 78-108         | 12-22    | 3-15             |

PCBs: Polychlorinated biphenyls; UAE: Ultrasound-assisted extraction

**Table S6.** Minimum and maximum recoveries (%) per class of POP, regarding the extraction solvent employed during UAE of surficial sediments.

| Compounds  | Solvent |                      |
|------------|---------|----------------------|
|            | DCM     | hexane/ethyl acetate |
| Pesticides | 65-103  | 84-119               |
| PCBs       | 53-75   | 101-115              |

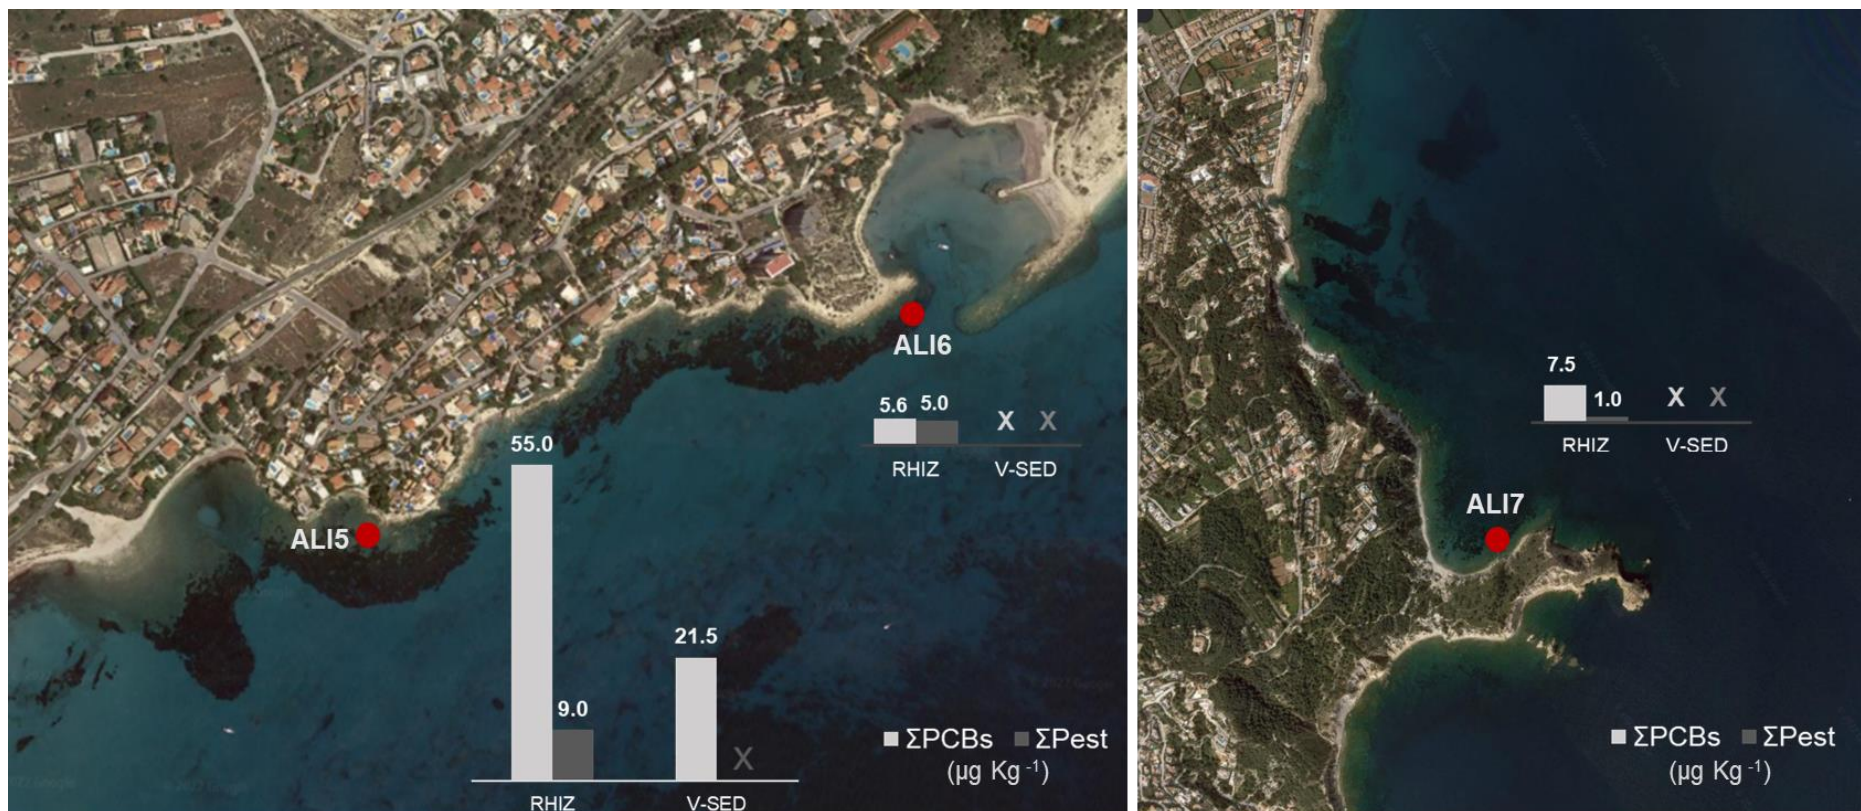

**Figure S2.** Location of ALI5, ALI6 and ALI7 sampling areas from Alicante and their corresponding  $\Sigma\text{PCBs}$  and  $\Sigma\text{Priority Pesticides}$  values ( $\mu\text{g kg}^{-1}$ ) in rhizomes (RHIZ) and vegetated sediment (V-SED). Images retrieved from Google (©Images 2022 CNES, NOAA, U.S. Navy. NGA, GEBCO, TerraMetrics, Landsat, Copernicus).

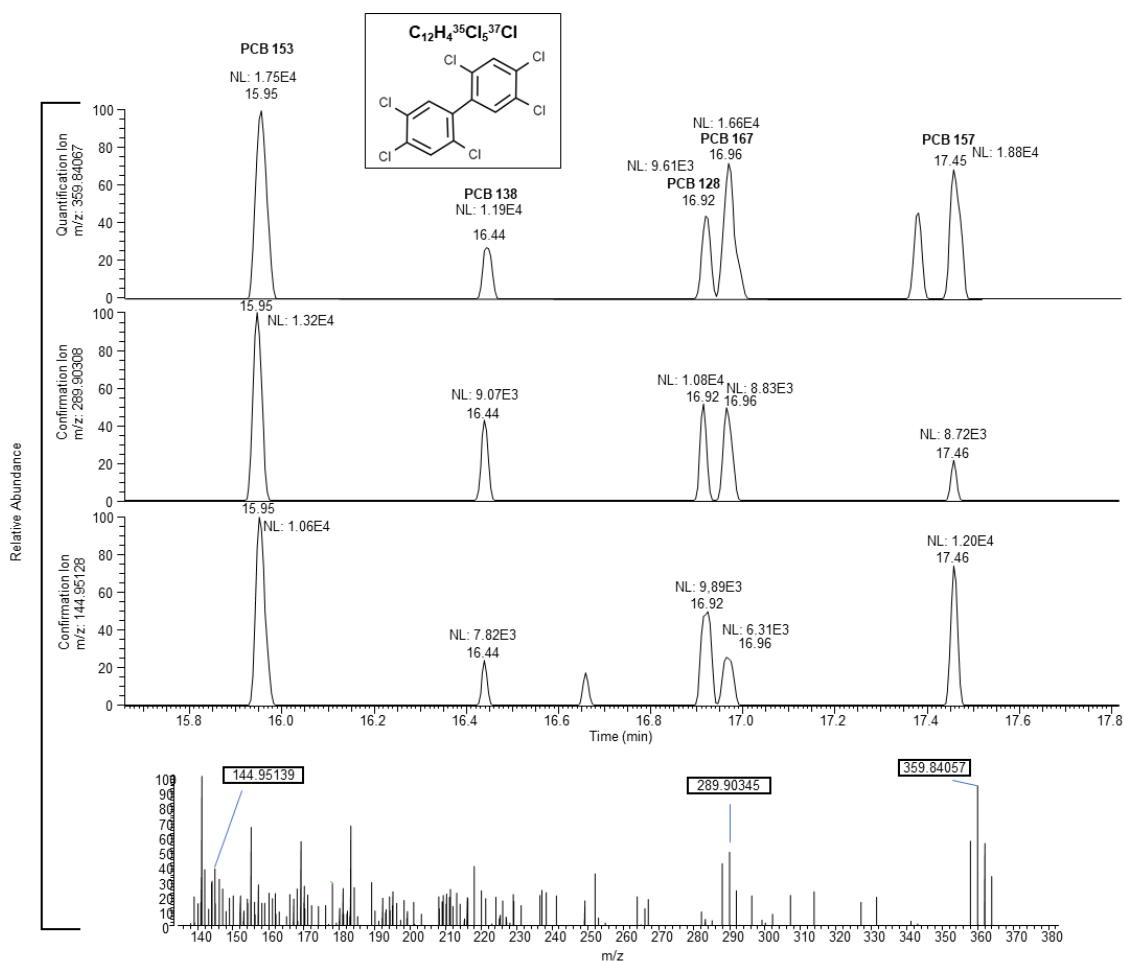

**Figure S3.** Extracted ion chromatogram and mass spectrum of PCB 153, 138, 128, 167, and 157 isomers detected in the vegetated sediment at ALI5.

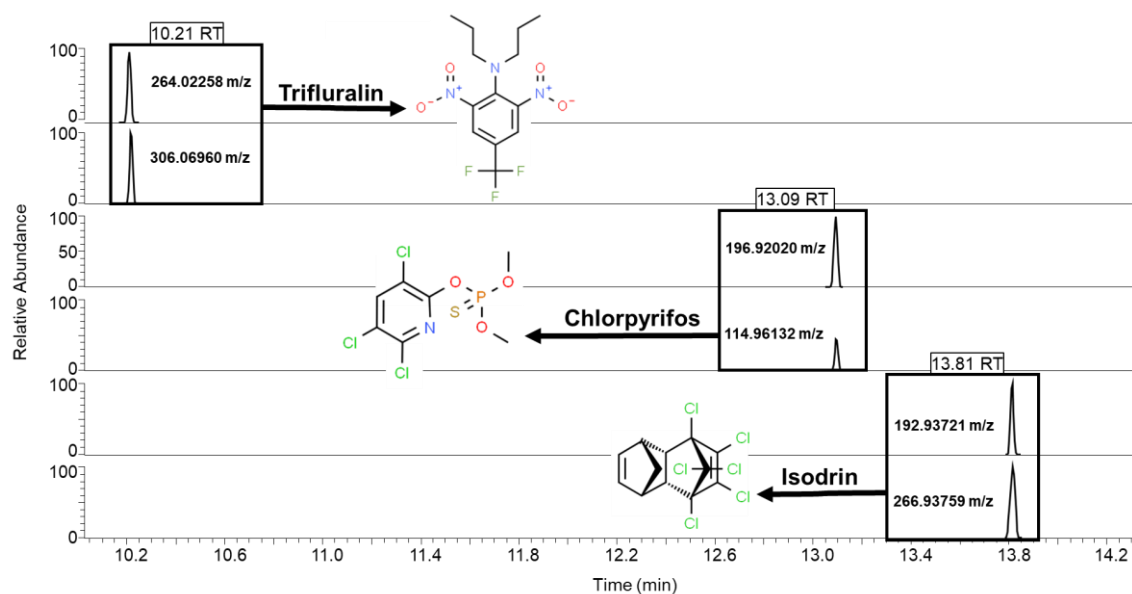

**Table S7.** Current-use pesticides identified in this study and their corresponding RT, molecular weight, log K<sub>ow</sub>, and their quantification and confirmation ions.

| RT (min) | Compound Name            | Molecular weight | log K <sub>ow</sub> | Quantification Ion 1 (m/z) | Ion 2 (m/z) | Ion 3 (m/z) |
|----------|--------------------------|------------------|---------------------|----------------------------|-------------|-------------|
| 7.81     | 2,4,6-trichlorophenol    | 197.4            | 3.69                | 195.92423                  | 197.92135   | 96.98392    |
| 8.52     | 1,4-Dimethyl naphthalene | 156.2            | 4.37                | 141.07042                  | 156.09390   | 142.07330   |
| 9.07     | 2-Phenylphenol           | 170.2            | 3.09                | 169.06480                  | 170.07239   | 141.06990   |
| 11.25    | Lindane                  | 290.8            | 3.72                | 180.93717                  | 182.93420   | 218.91092   |
| 11.42    | Pyrimethanil             | 199.3            | 2.84                | 198.10240                  | 183.07907   | 118.05251   |
| 12.67    | Terbutryn                | 241.4            | 3.74                | 170.04945                  | 185.07291   | 226.11209   |
| 13.17    | Tetraconazole            | 372.1            | 3.56                | 336.05173                  | 170.97610   | 158.97623   |
| 13.82    | Penconazole              | 284.2            | 4.40                | 158.97630                  | 160.97333   | 248.09490   |
| 14.02    | Prallethrin              | 300.4            | 4.49                | 123.11737                  | 81.07042    | 77.03912    |
| 14.69    | Fludioxonil              | 248.2            | 4.12                | 248.03912                  | 127.04166   | 154.05247   |
| 16.61    | Piperonylbutoxide        | 338.4            | 4.75                | 176.08373                  | 177.09155   | 193.08647   |
| 19.48    | Fenbuconazole            | 336.8            | 3.23                | 129.05784                  | 125.01580   | 198.09054   |
| 21.19    | Difenoconazole           | 406.3            | 4.30                | 264.98204                  | 323.02363   | 202.01799   |

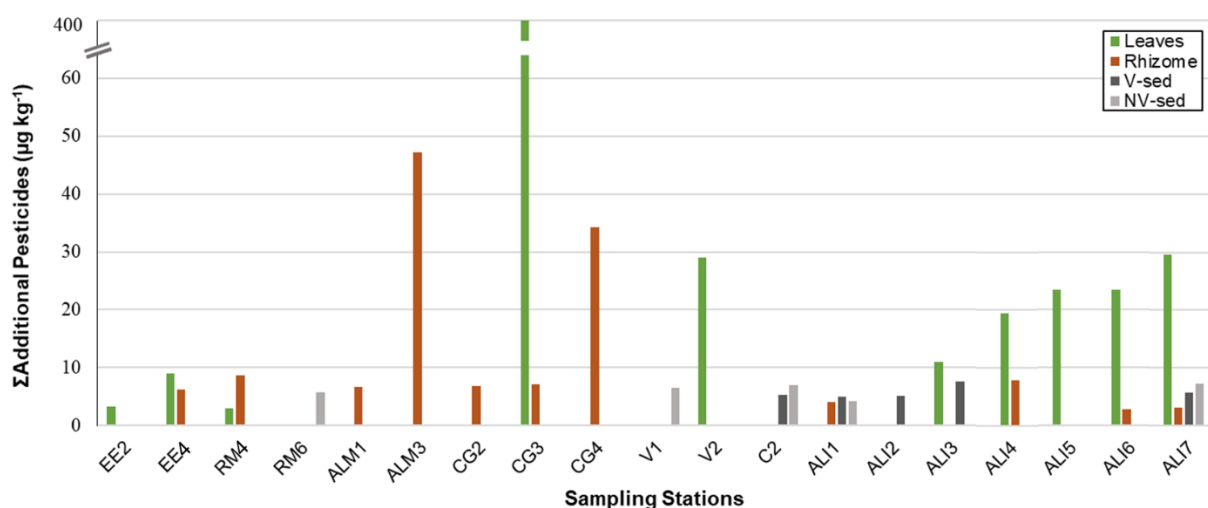

**Figure S5.** ΣCurrent-use pesticides of concern ( $\mu\text{g kg}^{-1}$ ) seen in the different studied matrices of the aquatic plant *P. oceanica*, vegetated sediments (V-sed) and non-vegetated (NV-sed) among different sampling stations.

**Table S8.** Summary of the known POPs extraction methods in *P. oceanica*. PLE: Pressurized Liquid Extraction.

| Source     | Solvent                      | Solvent volume (ml) | Sample (d.w. g) | Extraction Method and time |
|------------|------------------------------|---------------------|-----------------|----------------------------|
| This Study | hexane/ethyl acetate (9:1)   | 3                   | 0.15            | Polytron, ~12 min          |
| [15]       | hexane/ethyl acetate (9:1)   | 10                  | 5.0             | QuEChERS-rotavapor, n.d.   |
| [18]       | hexane/acetone (3:1)         | n.d.                | 0.5             | Soxhlet, 24 h              |
| [16]       | hexane/dichloromethane (1:1) | n.d.                | n.d.            | PLE, n.d.                  |
| [17]       | n.d.                         | n.d.                | 0.5             | PLE, n.d.                  |

n.d.: not described.

**Table S9.** PCBs concentration in rhizomes ( $\mu\text{g kg}^{-1}$  w.w.) compared to BAC and EAC for fish (*M. barbatus*) and mussels (*M. galloprovincialis*) used by OSPAR and Marine Strategy Framework Directive (MSFD). Wet weight values were obtained by considering the moisture content (%) of each sample.

| Site       | PCB 28+31 | PCB 52 | PCB 44 | PCB 81 | PCB 77 | PCB 153 | PCB 167 | $\Sigma$ PCBs | $\Sigma$ 7 PCBs |
|------------|-----------|--------|--------|--------|--------|---------|---------|---------------|-----------------|
| ALI5       | 10.07     | 1.51   | 10.54  | 9.13   | 10.45  | 1.88    | 8.19    | 51.77         | 13.46           |
| ALI6       | 1.72      | 0.57   | 1.82   | --     | 1.24   | --      | --      | 5.36          | 2.30            |
| ALI7       | 2.47      | 0.57   | 1.52   | 1.05   | 1.52   | --      | --      | 7.13          | 3.04            |
| BAC fish   | 0.10      | 0.08   | --     | --     | --     | 0.10    | --      | --            | --              |
| BAC mussel | 0.15      | 0.15   | --     | --     | --     | 0.12    | --      | --            | --              |
| EAC mussel | 0.64      | 1.08   | --     | --     | --     | 16.00   | --      | --            | --              |

**Table S10.** PCBs ( $\mu\text{g kg}^{-1}$  d.w.) concentrations detected in the Mediterranean Sea<sup>a,b,c,d</sup>. Only the sampling areas where contamination was detected have been included in the table.

| Matrix   | Site                      | PCB 18 | PCB 28+31 | PCB 52  | PCB 44 | PCB 101 | PCB 81 | PCB 77  | PCB 123 | PCB 118 | PCB 114  | PCB 153 | PCB 105 | PCB 138  | PCB 126 | PCB 128 | PCB 167 | PCB 157 | PCB 180 | PCB 170 | PCB 189 | $\Sigma$ PCBs | $\Sigma$ 7 PCBs | Source |
|----------|---------------------------|--------|-----------|---------|--------|---------|--------|---------|---------|---------|----------|---------|---------|----------|---------|---------|---------|---------|---------|---------|---------|---------------|-----------------|--------|
| Leaf     | Tunisia <sup>a</sup>      | n.s.   | 2.5-41.0  | * -3.0  | n.s.   | 0.7-1.6 | --     | 0.6-0.8 | 1.1-1.3 | * -0.2  | *        | 1.5-1.9 | --      | 1.3-1.7  | 1.2-3.5 | n.s.    | --      | --      | 1.5-1.9 | n.s.    | 0.9-1.0 | 10.9-55.6     | 7.0-50.0        | [15]   |
| Mussel   | Spain <sup>a</sup>        | n.s.   | --        | --      | n.s.   | --      | n.s.   | n.s.    | n.s.    | --      | n.s.     | 0.6-0.8 | n.s.    | *        | n.s.    | n.s.    | n.s.    | n.s.    | -- ; *  | n.s.    | n.s.    | n.s.          | 0.58            | [39]   |
|          | Adriatic Sea <sup>a</sup> | n.s.   | n.s.      | n.s.    | n.s.   | n.s.    | n.s.   | n.s.    | n.s.    | n.s.    | n.s.     | n.s.    | n.s.    | n.s.     | n.s.    | n.s.    | n.s.    | n.s.    | n.s.    | n.s.    | n.s.    | n.s.          | 7.7-115.4       | [46]   |
| Fish     | Tunisia <sup>a</sup>      | n.s.   | 0.5-4.5   | 0.3-1.1 | n.s.   | 0.2-1.1 |        | 0.2-0.4 | 0.3-0.9 | 0.3-0.7 | 0.02-0.2 | 0.5-1.0 | n.s.    | 0.4-0.8  | 0.4-0.7 | n.s.    | n.s.    | n.s.    | 0.3-0.8 | n.s.    | *       | 3.8-11.9      | 0.8-7.1         | [15]   |
|          | Tunisia <sup>a</sup>      | n.s.   | 0.5-1.1   | *-0.7   | n.s.   | *-0.7   | n.s.   | 0.2-0.5 | *-0.6   | *-0.5   | *-0.4    | *-0.9   | n.s.    | *-0.5    | 0.3-1.1 | n.s.    | n.s.    | n.s.    | *-0.5   | n.s.    | *       | 3.6-6.2       | 0.8-5.3         | [15]   |
|          | Tunisia <sup>a</sup>      | n.s.   | 0.1       | 0.1     | n.s.   | *       | --     | *       | *       | *       | *        | 0.1-0.3 | --      | 0.03-0.2 | 0.1     | n.s.    | --      | --      | 0.2     | n.s.    | 0.1-0.2 | 1.9-2.2       | 0.6-0.7         | [15]   |
| n.s. sed | Spain <sup>b</sup>        | n.s.   | *-0.8     | *-0.3   | n.s.   | *-0.8   | n.s.   | n.s.    | n.s.    | *-1.5   | n.s.     | *-4.5   | *       | *-2.8    | n.s.    | n.s.    | n.s.    | n.s.    | *-2.8   | n.s.    | n.s.    | * -14.4       | n.s.            | [40]   |
|          | Egypt <sup>c</sup>        | n.s.   | n.s.      | n.s.    | n.s.   | n.s.    | n.s.   | n.s.    | n.s.    | n.s.    | n.s.     | n.s.    | n.s.    | n.s.     | n.s.    | n.s.    | n.s.    | n.s.    | n.s.    | n.s.    | n.s.    | 1.0-2.0       | n.s.            | [41]   |
|          | Spain <sup>a</sup>        | n.s.   | 0.03      | 0.03    | n.s.   | 0.05    | n.s.   | n.s.    | n.s.    | 0.05    | 0.21     | n.s.    | n.s.    | 0.15     | n.s.    | n.s.    | n.s.    | n.s.    | 0.12    | n.s.    | n.s.    | n.s.          | 0.64            | [39]   |
|          | Italy <sup>c</sup>        | n.s.   | n.s.      | n.s.    | n.s.   | n.s.    | n.s.   | n.s.    | n.s.    | n.s.    | n.s.     | n.s.    | n.s.    | n.s.     | n.s.    | n.s.    | n.s.    | n.s.    | n.s.    | n.s.    | n.s.    | 3.7-54.9      | n.s.            | [42]   |
|          | Italy <sup>d</sup>        | n.s.   | n.s.      | n.s.    | n.s.   | n.s.    | n.s.   | n.s.    | n.s.    | n.s.    | n.s.     | n.s.    | n.s.    | n.s.     | n.s.    | n.s.    | n.s.    | n.s.    | n.s.    | n.s.    | n.s.    | 6-30          | n.s.            | [43]   |

Note that in this study PCB 28 congener eluted together with its isomer PCB 31, being both counted as only one compound, thus the  $\Sigma$ 7 PCBs value might be slightly overrated.

(n.s.): not specified or not studied; (--) analyte not found or detected. (\*) < LOQ.

<sup>a</sup> Coast

<sup>b</sup> Continental Shelf

<sup>c</sup> Estuary

<sup>d</sup> Port

**Table S11.** Priority pesticide concentrations ( $\mu\text{g kg}^{-1}$  d.w.) detected in biota and sediments from other studies.

| Matrix   | Site                      | Trifluralin | Chlorpyrifos | Isodrin | o,p'-DDT  | $\Sigma$ Pesticides | Source |
|----------|---------------------------|-------------|--------------|---------|-----------|---------------------|--------|
| Leaf     | Tunisia <sup>a</sup>      | --          | --           | n.s.    | *-0.6     | 54.7-88.9           | [15]   |
| Mussel   | Adriatic Sea <sup>a</sup> | n.s.        | n.s.         | n.s.    | n.s.      | ~4 to ~56           | [46]   |
| Fish     | Tunisia <sup>a</sup>      | --          | --           | n.s.    | *-0.3     | 2.1-48.3            | [15]   |
| Sediment | Italy <sup>c</sup>        | n.s.        | n.s.         | n.s.    | n.s.      | 0.6-6.3             | [42]   |
|          | Tunisia <sup>a</sup>      | --          | --           | n.s.    | 0.03-0.06 | 1.4-2.4             | [15]   |
|          | Egypt <sup>c</sup>        | n.s.        | n.s.         | n.s.    | n.s.      | 3.5-10.5            | [41]   |
|          | Spain <sup>b</sup>        | n.s.        | *-2.4        | n.s.    | n.s.      | *-4.6               | [40]   |

(n.s.): not specified or not studied; (--) analyte not found or detected. (\*) < LOQ.

<sup>a</sup> Coast

<sup>b</sup> Continental Shelf

<sup>c</sup> Estuary

## References (in the same order as cited in the original manuscript)

15. Jebara, A.; Lo Turco, V.; Potortì, A.G.; Bartolomeo, G.; Ben Mansour, H.; Di Bella, G. Organic pollutants in marine samples from Tunisian coast: Occurrence and associated human health risks. *Environ. Pollut.* **2021**, *271*, 116266, doi:10.1016/j.envpol.2020.116266.
16. Mauro, L.; Paola, G.; Margherita, V.; Rugiada, R.; Francesca, B.; Primo, M.; Duccio, S.; Enrica, F. Human impact on a small barrier reef meadow of *Posidonia oceanica* (L.) Delile on the north Tyrrhenian coast (Italy). *Mar. Pollut. Bull.* **2013**, *77*, 45–54, doi:10.1016/j.marpolbul.2013.10.036.
17. Pergent, G.; Labbe, C.; Lafabrie, C.; Kantin, R.; Pergent-Martini, C. Organic and inorganic human-induced contamination of *Posidonia oceanica* meadows. *Ecol. Eng.* **2011**, *37*, 999–1002, doi:10.1016/j.ecoleng.2011.02.001.
18. Apostolopoulou, M.V.; Monteyne, E.; Krikonis, K.; Pavlopoulos, K.; Roose, P.; Dehairs, F. Monitoring polycyclic aromatic hydrocarbons in the Northeast Aegean Sea using *Posidonia oceanica* seagrass and synthetic passive samplers. *Mar. Pollut. Bull.* **2014**, *87*, 338–344, doi:10.1016/j.marpolbul.2014.07.051.
39. Robinson, C.D.; Webster, L.; Martínez-Gómez, C.; Burgeot, T.; Gubbins, M.J.; Thain, J.E.; Vethaak, A.D.; McIntosh, A.D.; Hylland, K. Assessment of contaminant concentrations in sediments, fish and mussels sampled from the North Atlantic and European regional seas within the ICON project. *Mar. Environ. Res.* **2017**, *124*, 21–31, doi:10.1016/j.marenvres.2016.04.005.
40. León, V.M.; Viñas, L.; Concha-Graña, E.; Fernández-González, V.; Salgueiro-González, N.; Moscoso-Pérez, C.; Muniategui-Lorenzo, S.; Campillo, J.A. Identification of contaminants of emerging concern with potential environmental risk in Spanish continental shelf sediments. *Sci. Total Environ.* **2020**, *742*, 140505, doi:10.1016/j.scitotenv.2020.140505.
41. Abbassy, M.M.S. Distribution pattern of persistent organic pollutants in aquatic ecosystem at the Rosetta Nile branch estuary into the Mediterranean Sea, North of Delta, Egypt. *Mar. Pollut. Bull.* **2018**, *131*, 115–121, doi:10.1016/j.marpolbul.2018.03.049.
42. Montuori, P.; Aurino, S.; Garzonio, F.; Triassi, M. Polychlorinated biphenyls and organochlorine pesticides in Tiber River and Estuary: Occurrence, distribution and ecological risk. *Sci. Total Environ.* **2016**, *571*, 1001–1016, doi:10.1016/j.scitotenv.2016.07.089.
43. Moschino, V.; Del Negro, P.; De Vittor, C.; Da Ros, L. Biomonitoring of a polluted coastal area (Bay of Muggia, Northern Adriatic Sea): A five-year study using transplanted mussels. *Ecotoxicol. Environ. Saf.* **2016**, *128*, 1–10, doi:10.1016/j.ecoenv.2016.02.006.
46. Bajt, O.; Ramšak, A.; Milun, V.; Andral, B.; Romanelli, G.; Scarpato, A.; Mitrić, M.; Kupusović, T.; Kljajić, Z.; Angelidis, M.; et al. Assessing chemical contamination in the coastal waters of the Adriatic Sea using active mussel biomonitoring with *Mytilus galloprovincialis*. *Mar. Pollut. Bull.* **2019**, *141*, 283–298, doi:10.1016/j.marpolbul.2019.02.007.
